# Supplementary material
Source: publisher figshare collection journal article supplement (https://rs.figshare.com/ndownloader/files/22069656)
Supplement: Supplementary file 1 [file 22069656]

Supplemental material to: “Evaluation of scaffold microstructure and comparison of cell seeding methods using micro-CT based tools”

**Journal of the Royal Society Interface**

Aleksi Palmroth<sup>†</sup>, Sanna Pitkänen<sup>†</sup>, Markus Hannula<sup>†</sup>, Kaarlo Paakinaho, Jari Hyttinen, Susanna Miettinen and Minna Kellomäki

<sup>†</sup>Authors contributed equally

BioMediTech, Faculty of Medicine and Health Technology, Tampere University.

**Supplementary data file 1: Effect of micro-CT imaging parameters on distinguishing the iron-labelled microspheres from the composite scaffolds**

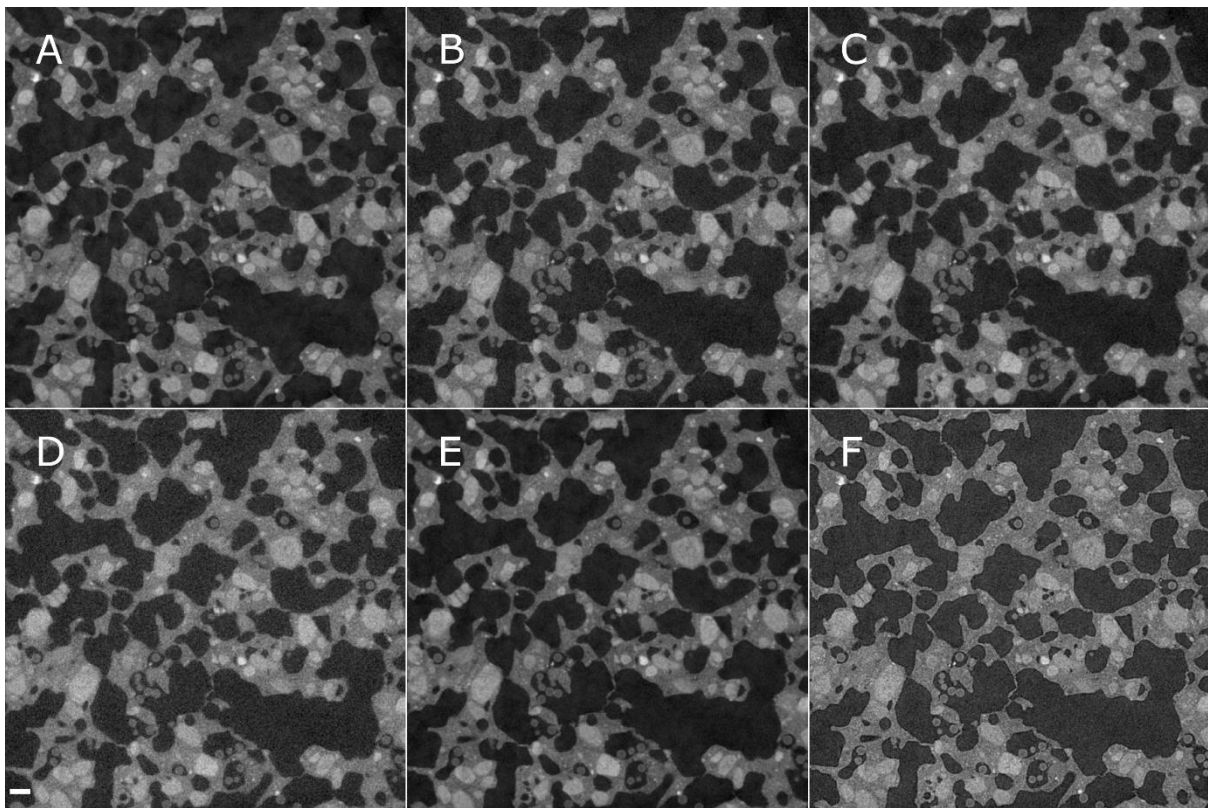

**Supplementary Figure 1.** Composite scaffold imaged with different imaging parameters. Contrast to noise ratios (CNRs) were calculated for easier comparison. Inline phase-contrast image (f) has rather poor contrast, but edges have been enhanced as expected. Scale bar is 200  $\mu\text{m}$ .

$$\text{CNR} = \frac{\text{Mean object intensity} - \text{Mean background intensity}}{\text{Standard deviation of background}}$$

(a) Voltage 40 kV, power 10 W, CNR = 10.3, (b) Voltage 80 kV, power 6 W, CNR = 7.7, (c) Voltage 80 kV, power 10 W, CNR = 8.3, (d) Voltage 140 kV, power 10 W, CNR = 6.5, (e) Voltage 40 kV, power 10 W, filter, CNR = 11.2, (f) Voltage 100 kV, power 10 W, inline phase-contrast, CNR = 6.0.
